# Supplementary material for: Microglial TLR4-dependent autophagy induces ischemic white matter damage via STAT1/6 pathway
Source: PubMed Central journal article supplement — Theranostics. 2018 Oct 29;8(19):5434–51. doi: 10.7150/thno.27882 (PMC6276098; doi:10.7150/thno.27882), 2018-10-29
Supplement: thnov08p5434s1.pdf [file thnov08p5434s1.pdf]

## **Supplementary Method**

### **Wortmannin (Wm) and bafilomycin (Baf) treatment *in vivo***

For wortmannin (Wm) treatment *in vivo*, Wm (0.5 mg/kg, HY-10197, MedChem Express, MCE) was dissolved in PBS and administered intraperitoneally for 3 consecutive days simultaneously after BCAS. For bafilomycin (Baf) treatment *in vivo*, Baf (10nm, HY-100558, MedChem Express, MCE) was dissolved in PBS and administered intraventricularly with ALZET osmotic mini-pumps (Cupertino, CA, model 1007D, pumping rate 0.11  $\mu$ l/h, continuous application for 3 days) simultaneously after BCAS. The dose and duration was selected according to our preliminary experiments.

### **Primary Cell Culture with IFN- $\gamma$ stimulation**

Primary microglia were isolated from the brain of neonatal wild-type and TLR4 knockout mice at P1–P2 as described previously. IFN- $\gamma$  (100 ng/mL Sigma–Aldrich, USA) was added to the microglial cultures for 24 hours for proinflammatory induction. The dose of IFN- $\gamma$  was selected according to our preliminary experiments.

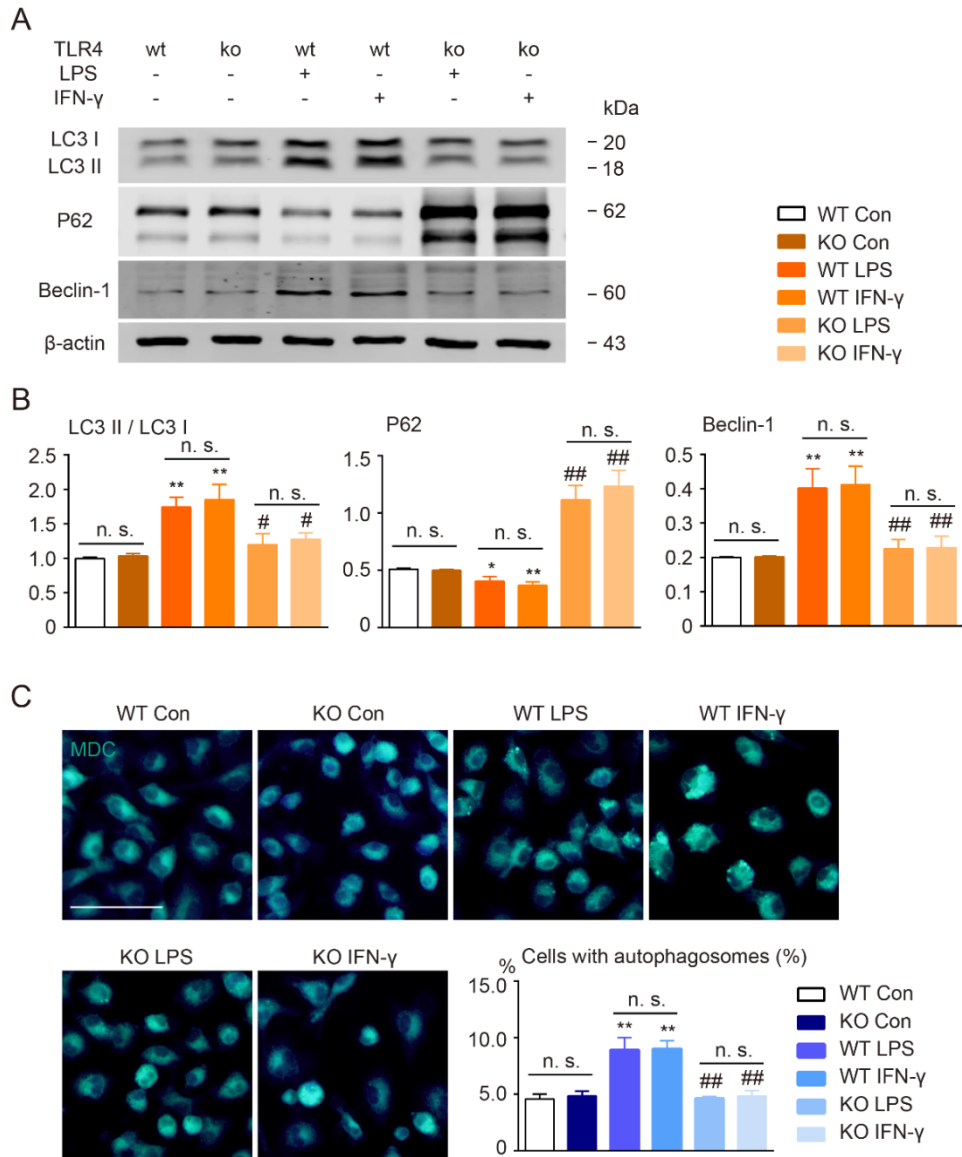

**Figure S1. LPS and IFN- $\gamma$  stimulated autophagy activation in cultured microglia**

(A) The expression of autophagy related proteins (LC3, P62 and Beclin-1) in cultured microglia were detected by Western blot.

(B) Quantitative analysis was performed. Two-way ANOVA with Dunnett's post-hoc test, \*\* $P < 0.01$  versus WT Control, # $P < 0.05$  ## $P < 0.01$  versus WT LPS, n.s. no significant changes between different groups.  $n = 8$  per group.

(C) Representative images of MDC staining for autophagosomes in cultured microglia. Scale bar, 50  $\mu\text{m}$ . Quantitative analysis of cells with autophagosomes was performed. Two-way ANOVA with Dunnett's post-hoc test, \*\* $P < 0.01$  versus WT Control, ## $P < 0.01$  versus WT LPS, n.s. no significant changes between different groups.  $n = 6$  per group.

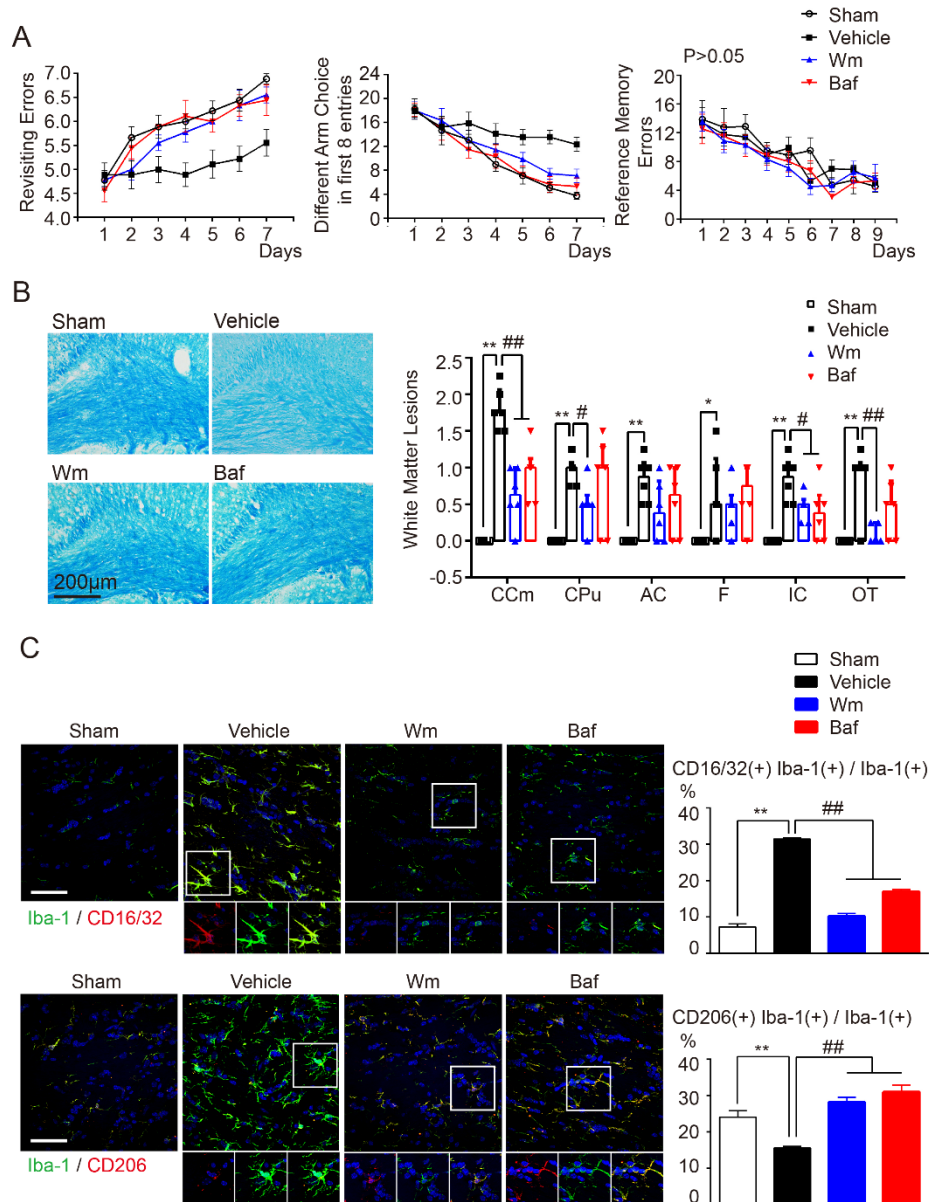

**Figure S2. TLR4 deficiency attenuated cognitive impairment and white matter lesions induced by BCAS**

(A) The working memory and reference memory of mice were assessed by the 8-arm maze test at 1-month post injury. Mice suffered from BCAS made much more revisiting errors ( $P < 0.001$ ) and less different arm choices ( $P < 0.001$ ) comparing to the sham-operated mice. Wm- and Baf- treated mice with BCAS made much less revisiting errors ( $P < 0.001$ ) and more different arm choices ( $P < 0.001$ ) comparing to the vehicle group. No impairment in spatial reference memory was revealed between different groups ( $P > 0.05$ ). Two-way analysis of variance (ANOVA) with repeated analysis,  $n = 9$  in each group.

(B) White matter lesions were detected by LFB staining in different groups. Scale bar, 200  $\mu\text{m}$ . Dot-plot with median and interquartile range of the severity of white matter lesions in in CCm, CPu, AC, IC, F and OT in histogram. Two-way ANOVA with Dunnett's post-hoc test,  $**P < 0.01$  versus Sham,  $\#P < 0.05$ ,  $\#\#\#P < 0.01$  versus Vehicle  $n = 6$  per group.

(C) Representative confocal images of coronal sections labeled with Iba-1, CD16/32 and CD206 at 1-month post BCAS. Scale bar, 50 $\mu$ m. Quantitative analysis of Iba-1, CD16/32 double positive cells and Iba-1, CD206 double positive cells was shown in the histogram. Two-way ANOVA with Dunnett's post-hoc test, \*\*P<0.01 *versus* Sham, ##P<0.01 *versus* Vehicle. n=6 per group.
